# Supplementary material for: New Insights into the Traditional Charge Compensation Theory: Amphoteric Behavior of TiO2 under the Guidance of Supply–Demand Relationship
Source: PubMed Central journal article supplement — ACS Omega. 2022 Jun 6;7(24):21225–32. doi: 10.1021/acsomega.2c02252 (PMC9347970; doi:10.1021/acsomega.2c02252), 2022-06-06
Supplement: ao2c02252_si_001.pdf [file ao2c02252_si_001.pdf]

# Supporting Information

## New Insights into Traditional Charge Compensation Theory: Amphoteric Behavior of TiO<sub>2</sub> under the Guidance of Supply-Demand Relationship

Zhisheng Bi <sup>a</sup>, Kejiang Li <sup>\*,a</sup>, Chunhe Jiang <sup>a</sup>, Jianliang Zhang <sup>a</sup>, Shufang Ma <sup>a</sup>, Conejo Alberto <sup>a</sup>, Minmin Sun <sup>a</sup>, Yushan Bu <sup>a</sup>, Mansoor Barati <sup>b</sup>, Shan Ren <sup>\*,c</sup>

<sup>a</sup> School of Metallurgical and Ecological Engineering, University of Science and Technology Beijing, Beijing 100083, P.R. China

<sup>b</sup> Department of Materials Science and Engineering, University of Toronto, Toronto, ON M5S 3E4, Canada

<sup>c</sup> School of Materials Science and Engineering, Chongqing University, Chongqing 400044, P.R. China

\*Corresponding author: Kejiang Li, Shan Ren

Address:

Kejiang Li: 30 Xueyuan Rd., Haidian District, Beijing 100083, PR China.

Shan Ren: No.174 Shazheng Rd., Shapingba District, Chongqing 400044, P.R. China

E-mail: likejiang@ustb.edu.cn (Kejiang Li); shan.ren@cqu.edu.cn (Shan Ren)

## 1. Computational Methodology

### 1.1. Simulation methods

In the present molecular dynamics simulation, nearly 10000 atoms were selected to be put into a cubic box. The components of studied systems have been listed in Table. S1. The variables studied are TiO<sub>2</sub> contents and basicity and the temperature was kept at 2273 K (absolute temperature). The notation of B*i*T*j* indicates that the different TiO<sub>2</sub> contents and basicity. In which B represents the basicity, T represents the TiO<sub>2</sub>, *i* equals 1, 2, 3, 4 respectively (representing the corresponding basicity of 0.5, 0.9, 1.3 and 1.7 respectively), and *j* equals 1, 2, 3, 4, 5, 6 respectively (representing the TiO<sub>2</sub> contents of 10 wt.%, 15 wt.%, 20 wt.%, 25 wt.%, 30 wt.% and 35 wt.% respectively). Newton's law of motion, NVT (Number of particles, System Volume, Temperature) ensemble and periodic boundary conditions were applied to this simulation.

Table. S1 Components of the studied blast furnace slag system

| Basicity | Samples | Si atoms | Ca atoms | Ti atoms | O atoms | Sum   |
|----------|---------|----------|----------|----------|---------|-------|
| B=0.5    | B1T1    | 2248     | 1205     | 282      | 6265    | 10000 |
|          | B1T2    | 2142     | 1147     | 427      | 6285    | 10001 |
|          | B1T3    | 2033     | 1089     | 574      | 6303    | 9999  |
|          | B1T4    | 1923     | 1030     | 723      | 6322    | 9998  |
|          | B1T5    | 1811     | 970      | 876      | 6344    | 10001 |
|          | B1T6    | 1697     | 909      | 1031     | 6365    | 10002 |
| B=0.9    | B2T1    | 1850     | 1784     | 294      | 6072    | 10000 |
|          | B2T2    | 1759     | 1696     | 444      | 6102    | 10001 |
|          | B2T3    | 1666     | 1607     | 596      | 6131    | 10000 |
|          | B2T4    | 1573     | 1517     | 749      | 6161    | 10000 |
|          | B2T5    | 1478     | 1425     | 905      | 6191    | 9999  |
|          | B2T6    | 1382     | 1332     | 1063     | 6222    | 9999  |
| B=1.3    | B3T1    | 1572     | 2189     | 302      | 5937    | 10000 |
|          | B3T2    | 1492     | 2078     | 456      | 5974    | 10000 |
|          | B3T3    | 1412     | 1966     | 611      | 6012    | 10001 |
|          | B3T4    | 1330     | 1853     | 768      | 6049    | 10000 |
|          | B3T5    | 1248     | 1739     | 926      | 6087    | 10000 |
|          | B3T6    | 1165     | 1623     | 1086     | 6125    | 9999  |

|       |      |      |      |      |      |       |
|-------|------|------|------|------|------|-------|
| B=1.7 | B4T1 | 1366 | 2488 | 308  | 5836 | 9998  |
|       | B4T2 | 1296 | 2360 | 464  | 5880 | 10002 |
|       | B4T3 | 1225 | 2230 | 622  | 5924 | 10001 |
|       | B4T4 | 1153 | 2100 | 781  | 5968 | 9998  |
|       | B4T5 | 1081 | 1968 | 941  | 6012 | 10001 |
|       | B4T6 | 1008 | 1835 | 1102 | 6055 | 10002 |

Table. S2. BMH model parameters used in this simulation <sup>1,2</sup>.

| i  | j  | A <sub>ij</sub> (gÅ <sup>2</sup> /fs <sup>2</sup> ) | B <sub>ij</sub> (1/Å) | C <sub>ij</sub> (gÅ <sup>8</sup> /fs <sup>2</sup> ) | D <sub>ij</sub> (gÅ <sup>10</sup> /fs <sup>2</sup> ) |
|----|----|-----------------------------------------------------|-----------------------|-----------------------------------------------------|------------------------------------------------------|
| Si | Si | 3.47E-23                                            | 6.25                  | 0.00                                                | 0.00                                                 |
| Si | Ca | 4.28E-22                                            | 6.25                  | 0.00                                                | 0.00                                                 |
| Si | Ti | 1.40E-22                                            | 6.25                  | 0.00                                                | 0.00                                                 |
| Si | O  | 1.01E-21                                            | 6.06                  | 0.00                                                | 0.00                                                 |
| Ca | Ca | 5.27E-21                                            | 6.25                  | 6.95E-26                                            | 0.00                                                 |
| Ca | Ti | 1.72E-21                                            | 6.25                  | 0.00                                                | 0.00                                                 |
| Ca | O  | 1.15E-20                                            | 6.06                  | 1.39E-25                                            | 0.00                                                 |
| Ti | Ti | 5.63E-22                                            | 6.25                  | 0.00                                                | 0.00                                                 |
| Ti | O  | 3.89E-21                                            | 6.06                  | 0.00                                                | 0.00                                                 |
| O  | O  | 2.40E-20                                            | 5.88                  | 2.78E-25                                            | 0.00                                                 |

After obtaining the data, the radial distribution functions (RDFs), oxygen network structure, polymerization degree of system, viscosity were analyzed by using tools such as VMD <sup>3</sup> and ISSACS <sup>4</sup>. All the computations were performed on the GPC supercomputer at the SciNet HPC Consortium in the Compute/Calcul Canada national computing platform <sup>5,6</sup>.

### 1.2. Calculation methods

Coordination numbers (CNs) represent the number of the first neighbor atoms (O atoms) of an atom (B atom), which are obtained by integrating the first peak and valley of the CNs and the formula (equation. 1) is as follows:

$$N_{ij}(r) = \frac{4\pi N_j}{V} \int_0^r r^2 g_{ij}(r) dr \quad (1)$$

Radial distribution functions (RDFs) describe the distribution of other ions around an ion, and characterize the probability of finding other ions around an ion. Therefore, the RDFs are the best parameters to explain whether the potential function and its parameters match the system. The equation. 2 lists the mathematical expression of RDFs.

$$g_{ij}(r) = \frac{v}{N_i N_j} \sum_j \frac{n(r)}{4\pi r^2 \Delta r} \quad (2)$$

## 2. Results and discussion

### 2.1. Radial Distribution Functions (RDFs) and Bond Length

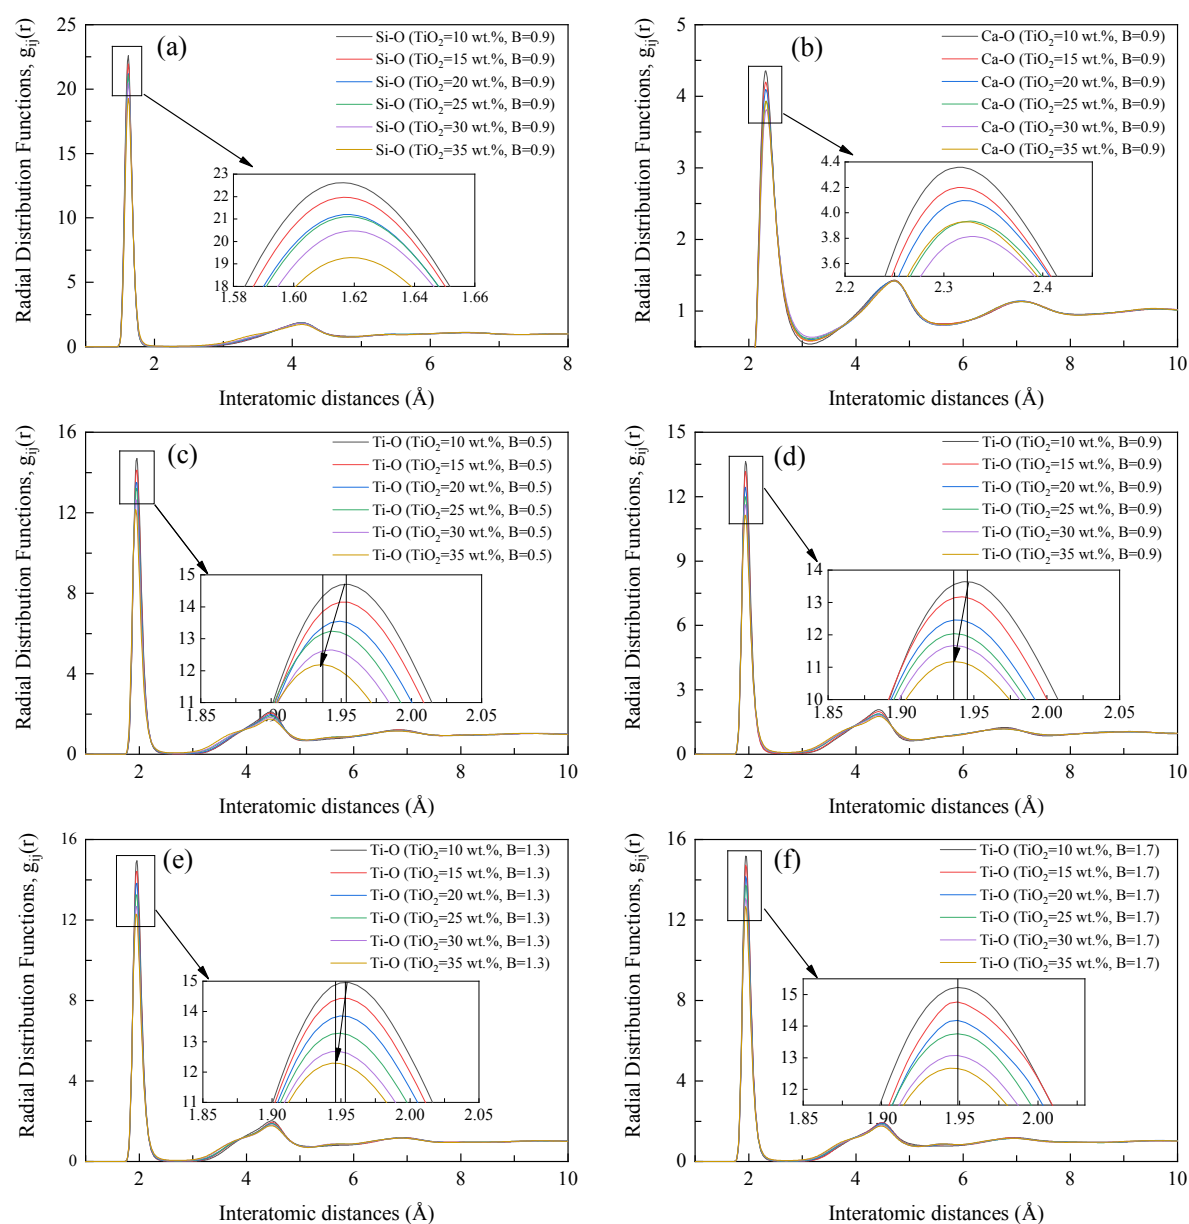

Figure S1. RDFs under different TiO<sub>2</sub> contents and basicity conditions. The first peak of each figure is enlarged and the vertical lines perpendicular to the abscissa axis in the enlarged view highlight the peak value under the corresponding radial distribution functions: (a) the RDFs of Si-O atoms (influence of TiO<sub>2</sub>); (b) the RDFs of Ca-O atoms (influence of TiO<sub>2</sub>); (c-f) the RDFs of Al-O atoms (influence of TiO<sub>2</sub> and basicity).

To facilitate analysis, the RDFs between various cations and oxygen ions of representative samples were plotted and shown in Figure S1. The first peak of each graph in Figure S1 is the most probable bond distances of the corresponding ion-pair, which is used to estimate the corresponding bond length. The  $r_1$  is the abscissa of the first peak of the radial distribution function of the corresponding ion-pair, representing the nearest neighbor bond length of the ion-pair. Previous experiments and simulations<sup>7-10</sup> have proved that the  $r_1$  of Si-O bonds should be between 1.61-1.62Å, the  $r_1$  of Ca-O bonds should be between 2.29-2.83Å, the  $r_1$  of Ti-O bonds should be between 1.82-2.18Å.

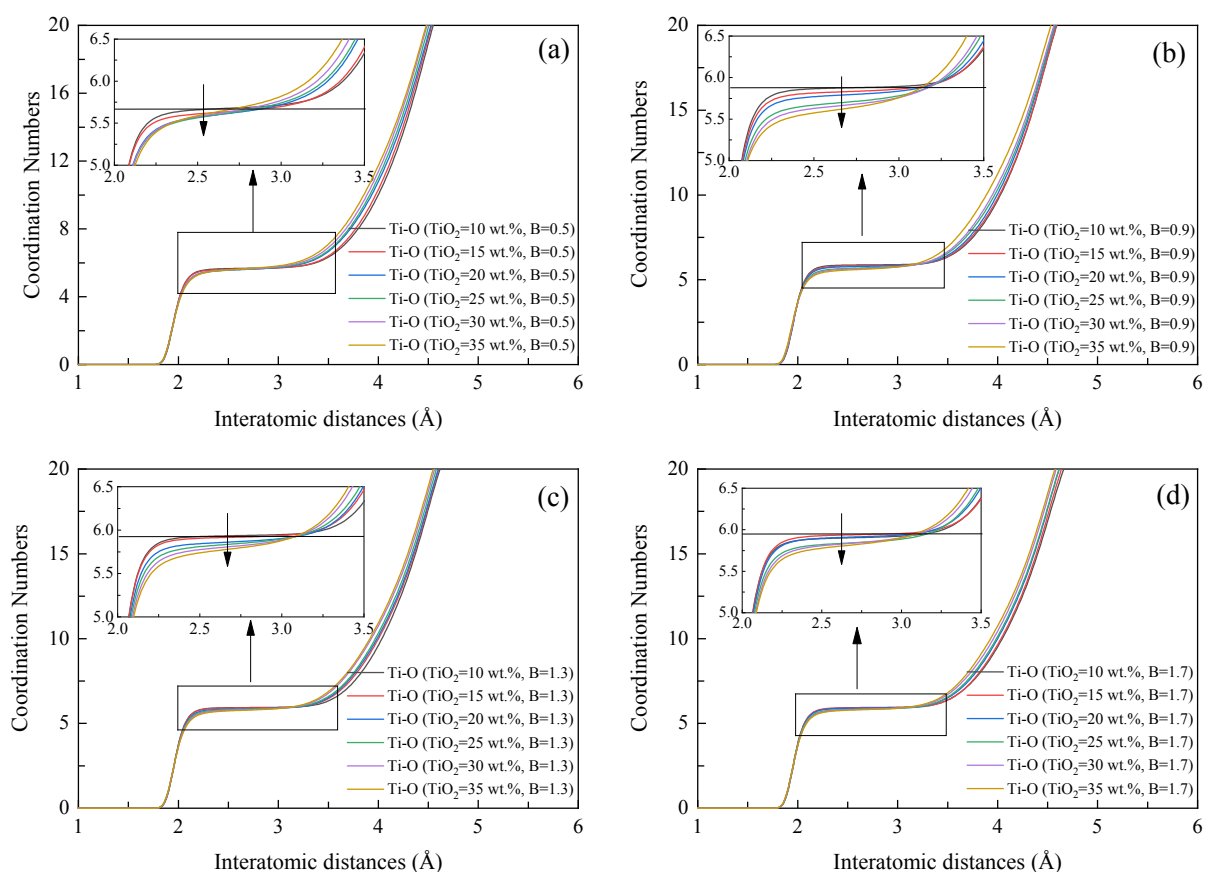

Figure S2. CNs of O atoms around Ti atoms under different TiO<sub>2</sub> contents and basicity conditions. The part where the slope of the coordination number curve is close to zero is enlarged and put into each figure and the straight lines parallel to the abscissas in the partial enlarged view mark the maximum coordination number in the samples: (a) variation of CNs with TiO<sub>2</sub> contents when basicity is 0.5; (b) variation of CNs with TiO<sub>2</sub> contents when basicity is 0.9; (c) variation of CNs with TiO<sub>2</sub> contents when basicity is 1.3; (d) variation of CNs with TiO<sub>2</sub> contents when basicity is 1.7.

## 2.2. Bond Angle and Local Structure Evolution

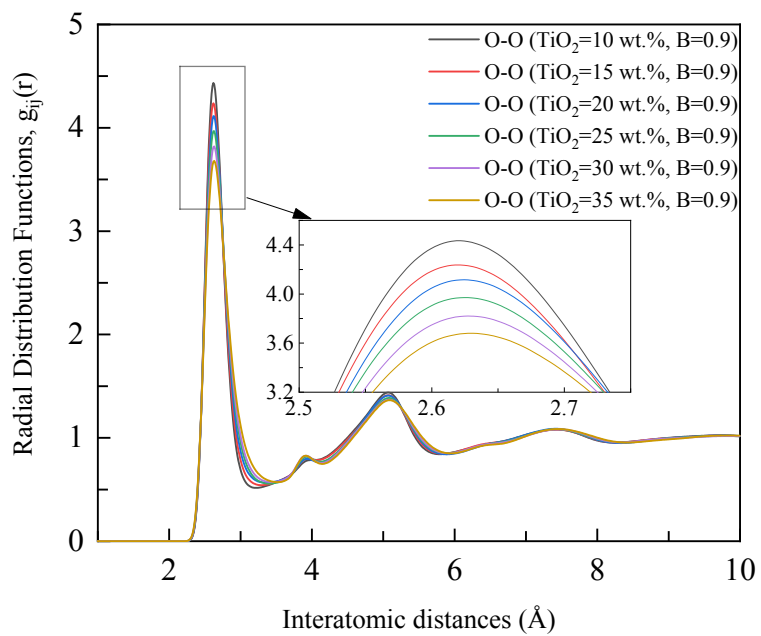

Figure S3. O-O RDFs under different  $\text{TiO}_2$  contents and basicity conditions.



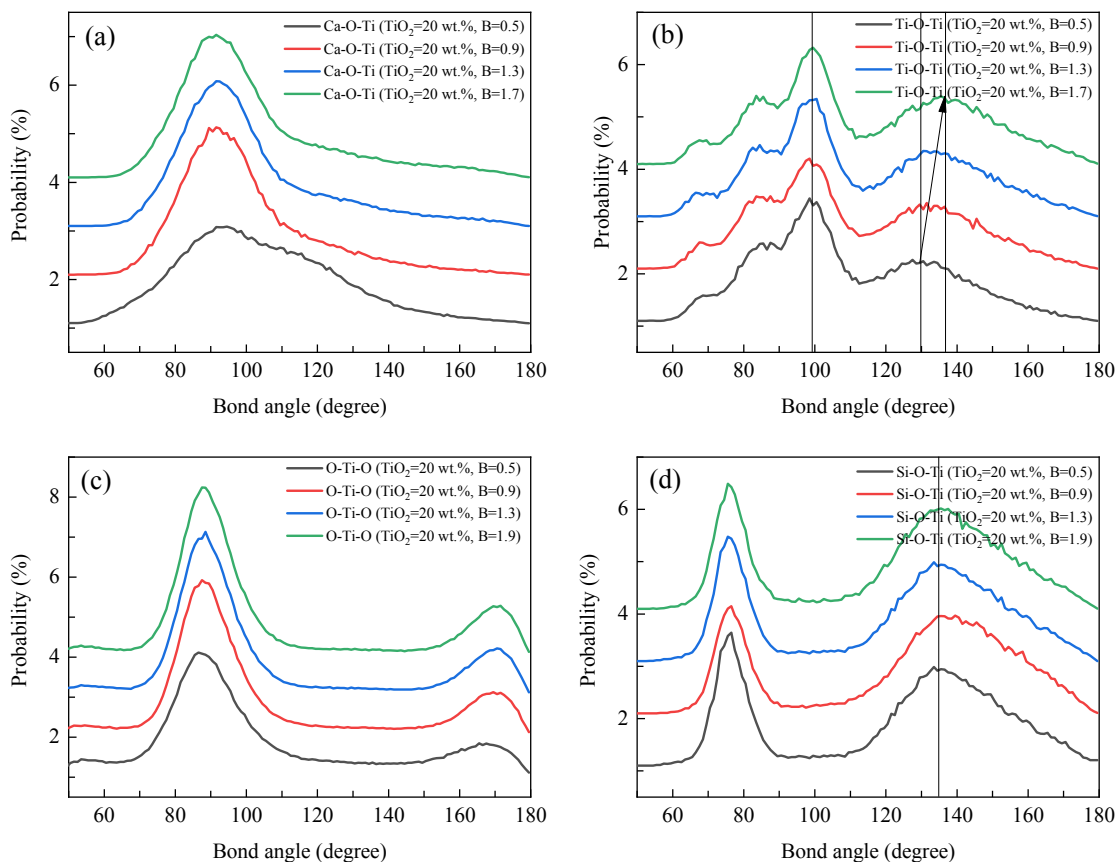

Figure S4. Change situation of bond angle with the basicity. Part peak values are marked with straight lines perpendicular to the abscissa axis, and the arrows on the way point to the change situation of peak value with the basicity: (a) variation of Ca-O-Ti bond angle with the basicity; (b) variation of Ti-O-Ti bond angles with the basicity; (c) variation of O-Ti-O bond angles with the basicity; (d) variation of Si-O-Ti bond angles with the basicity.

### 2.3. Oxygen Network Structure and Global Structural Stability

For the microstructure of the system, it is very important to study the contents of bridge oxygen (BO) and non-bridge oxygen (NBO). Besides BO and NBO, the network structure of oxygen also includes free oxygen (FO) and oxygen triclusters (TO). Schematic diagrams of the percentage content of different types of oxygen are shown in Figure S5.

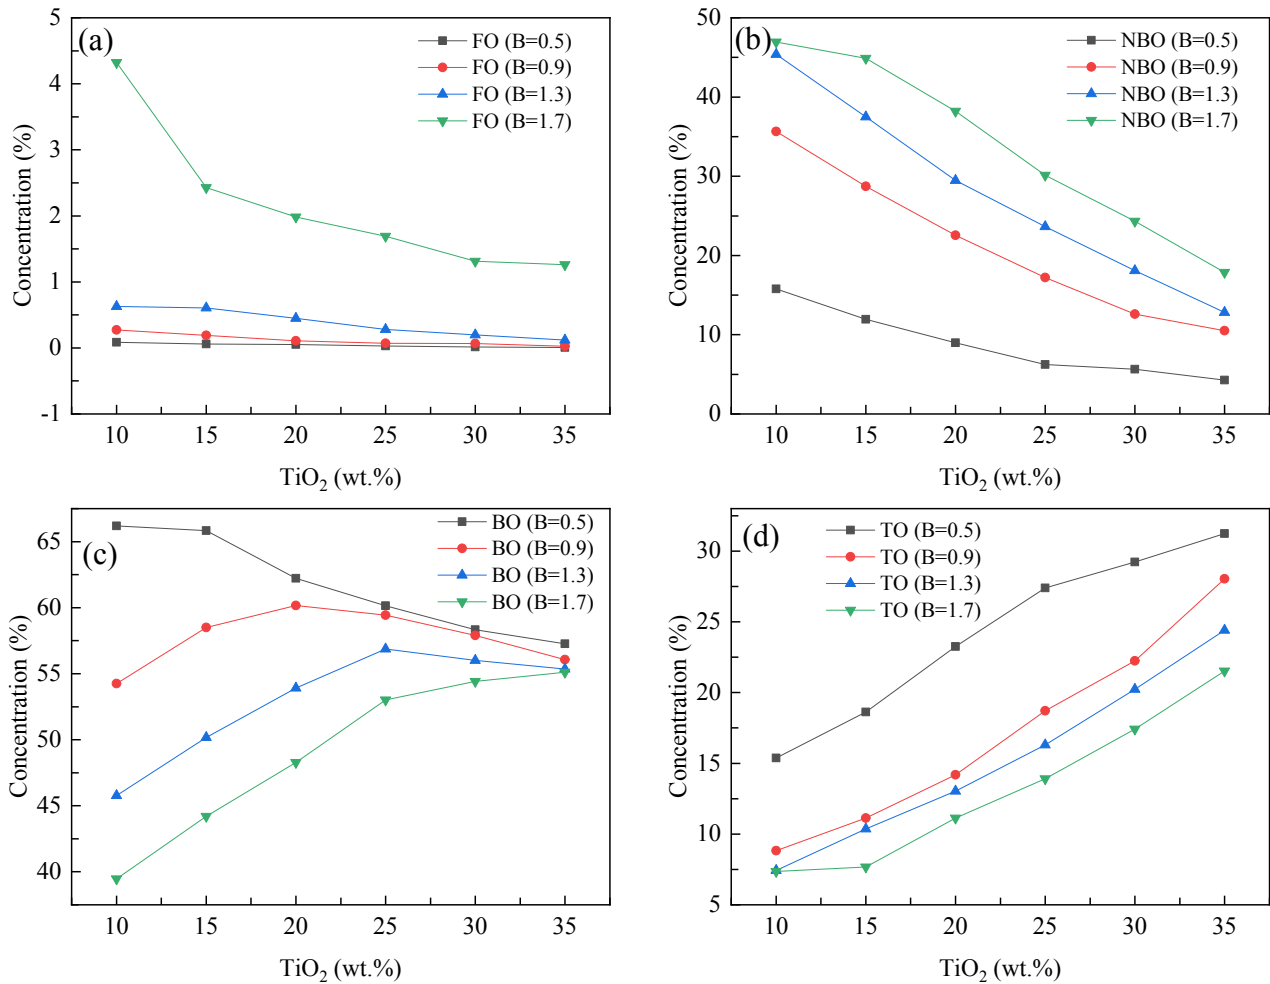

Figure S5. The concentrations of various types of oxygen with different  $\text{TiO}_2$  contents and basicity. Among them, the influence of  $\text{TiO}_2$  contents on different types of oxygen atoms is studied horizontally, and the influence of basicity on different types of oxygen atoms is compared vertically: (a) effect of basicity and  $\text{TiO}_2$  contents on FO contents; (b) effect of basicity and  $\text{TiO}_2$  contents on NBO contents;

---

(c) effect of basicity and TiO<sub>2</sub> contents on BO contents; (d) effect of basicity and TiO<sub>2</sub> contents on TO contents.

From the point of view of global structure, with the increase of TiO<sub>2</sub> contents in the system, free oxygen and non-bridge oxygen in the system have been decreasing (Figure S5(a-b)), which is because Ti<sup>4+</sup> ions tend to form TiO<sub>6</sub> octahedrons with O<sup>2-</sup> ions, and the charge of non-bridge oxygen ions is not saturated, there is an active site left. Therefore, Ti<sup>4+</sup> ions have strong binding ability with free oxygen and non-bridge oxygen in the system, which leads to the decrease of free oxygen and non-bridge oxygen contents in the system. Longitudinal analyses of Figure S5(a-b) show that the contents of free oxygen and non-bridge oxygen in the system with higher basicity are higher than that in the system with lower basicity. High basicity provides more Ca<sup>2+</sup> ions and O<sup>2-</sup> ions for the system, which alleviates the situation that free oxygen and non-bridge oxygen can't satisfy Ti<sup>4+</sup> ions, which makes the system with high basicity have higher free oxygen and unbridged oxygen contents.

Bridge oxygen, as the connecting bridge of polyhedral structures under the microscopic view of the system, is very important to study the global atomic structure. The existing publications<sup>11-13</sup> have explained that TiO<sub>2</sub> is an amphoteric oxide, and this simulation also proves that TiO<sub>2</sub> does have amphoteric transformation behavior from the perspective of atomic structure, and the show acid-base properties behavior is affected by the basicity of the system. In the text, the changes and reasons of the bond angle in Figure S5c are analyzed in detail. The variation of the content of system TO is shown in Figure S5d. It could be found that the contents of TO always increase with the increase of TiO<sub>2</sub> contents under any basicity conditions. Combined with Figure 5c, it could be proved that when excessive Ti<sup>4+</sup> ions compete with other polyhedral structures for oxygen atoms, this part of the contended oxygen

---

atoms is changed from BO to TO. Therefore, the BO contents of the system decrease and the TO contents increase.

In addition, through the basic equivalent idea, the calculation model of oxide amphoteric transformation can be established. There are three basic facts or assumptions in this model. First: oxygen ion is the only negative charge carrier of the system, and the balance between supply and demand of oxygen ion is the basic relationship of supply and demand theory Second: all polyhedral structures of the system are connected by oxygen ions. Third: NBO is equivalent to 0.5 BO, and TO oxygen is equivalent to 1.5 BO. The model calculation formula is as follows:

$$\Delta N(O) = N(O)_{supplied} - N(O)_{demanded} \quad (3)$$

$$N(O)_{supplied} = 2 \times R \times N_O \quad (4)$$

$$R = \frac{\sum(0.5 \times P_{NBO} + P_{BO} + 1.5 \times P_{TO})}{N_{sample}} \quad (5)$$

$$N(O)_{demanded} = \sum(N_i \times P_i \times i) \quad (6)$$

The core of the supply-demand relationship model is to virtualized break the complex network structure of the system. Through  $N(O)_{demanded}$ , the number of equivalent oxygen atoms demanded by the polyhedron in the system can be clarified. Then use  $N(O)_{supplied}$  to calculate the number of equivalent oxygen atoms that the system can supply. The difference is the balance between supply and demand. In which  $\Delta N(O)$  is the function of oxygen atoms supplied and demanded.  $N(O)_{supplied}$ ,  $N(O)_{demanded}$  represent the number of equivalent oxygen atoms supplied and demanded in the supply-demand relationship, respectively.  $N_O$  represents the initial number of oxygen atoms.

First, we equate all initial oxygen atoms as bridge oxygen atoms, and two polyhedrons share a bridge oxygen atom. Therefore, the equivalent oxygen atoms that the system can supply are the product of

twice the initial oxygen atoms and the limit factor. It should be emphasized that the initial oxygen atom is the number of oxygen atoms when the system is set. Then, it is hardly possible for all oxygen atoms in the system to be equivalent to bridge oxygen atoms, so the limit factor  $R$  is used for correction.  $R$  represents the limit factor, that is, the maximum ratio of all oxygen atoms equivalent to BO. The calculation idea of  $R$  is that all types of oxygen atoms in all sample is supposed to be BO, and then take the percentage of all samples average value. The NBO is equivalent to 0.5 BO, and the TO is equivalent to 1.5 bridging oxygen. Data statistics of NBO, BO and TO are performed for all samples, and the equivalent calculation in equation (4) is performed.  $N_{sample}$  represents the sample size. The larger the sample size, the closer the limit factor is to reality.  $P_{NBO}$ ,  $P_{BO}$  and  $P_{TO}$  respectively represents the percentage content of NBO, BO and oxygen triclusters (TO) in the sample. Finally, the calculation idea of  $N(O)_{demanded}$  is to count the total number of oxygen atoms required by polyhedrons with different coordination numbers.  $N_i$  is the total number of cations corresponding to different coordination structures.  $P$  is the percentage content, and the  $i$  is the coordination number of polyhedrons.

After analyzing the atomic structure, the content of different types of oxygen atoms can be obtained as shown in Table S3.

Table S3. The content of different types of oxygen atoms

| Basicity | Samples | FO    | NBO    | BO     | TO     |
|----------|---------|-------|--------|--------|--------|
| B=0.5    | B1T1    | 0.085 | 15.789 | 66.187 | 15.381 |
|          | B1T2    | 0.061 | 11.958 | 65.831 | 18.632 |
|          | B1T3    | 0.052 | 8.974  | 62.222 | 23.258 |
|          | B1T4    | 0.031 | 6.229  | 60.152 | 27.398 |
|          | B1T5    | 0.013 | 5.652  | 58.326 | 29.231 |
|          | B1T6    | 0.005 | 4.265  | 57.265 | 31.231 |
| B=0.9    | B2T1    | 0.272 | 35.661 | 54.241 | 8.824  |
|          | B2T2    | 0.19  | 28.723 | 58.503 | 11.131 |
|          | B2T3    | 0.108 | 22.553 | 60.164 | 14.194 |

|       |      |       |        |        |        |
|-------|------|-------|--------|--------|--------|
|       | B2T4 | 0.072 | 17.212 | 59.434 | 18.711 |
|       | B2T5 | 0.068 | 12.616 | 57.894 | 22.232 |
|       | B2T6 | 0.027 | 10.525 | 56.072 | 28.041 |
| B=1.3 | B3T1 | 0.63  | 45.382 | 45.767 | 7.424  |
|       | B3T2 | 0.63  | 45.382 | 45.767 | 7.424  |
|       | B3T3 | 0.606 | 37.494 | 50.179 | 10.362 |
|       | B3T4 | 0.448 | 29.476 | 53.918 | 13.027 |
|       | B3T5 | 0.281 | 23.636 | 56.877 | 16.296 |
|       | B3T6 | 0.196 | 18.083 | 56.01  | 20.24  |
| B=1.7 | B4T1 | 4.321 | 46.949 | 39.46  | 7.364  |
|       | B4T2 | 2.43  | 44.884 | 44.199 | 7.671  |
|       | B4T3 | 1.984 | 38.198 | 48.277 | 11.131 |
|       | B4T4 | 1.691 | 30.127 | 53.012 | 13.91  |
|       | B4T5 | 1.314 | 24.323 | 54.426 | 17.416 |
|       | B4T6 | 1.261 | 17.885 | 55.114 | 21.526 |

After the calculation of Equation 3, there is the result that  $R=0.92-0.93$ .

The calculation results of  $N(O)_{supplied}$  and  $N(O)_{demanded}$  are shown in Table S4.

Table S4. The calculation results of  $N(O)_{supplied}$  and  $N(O)_{demanded}$

| $N(O)_{supplied}$ | $N(O)_{demanded}$ | $\Delta(O)$ |
|-------------------|-------------------|-------------|
| 11653             | 12152             | -499        |
| 11690             | 12809             | -1119       |
| 11724             | 13459             | -1735       |
| 11759             | 14114             | -2355       |
| 11800             | 14766             | -2966       |
| 11839             | 15425             | -3586       |
| 11294             | 10168             | 1126        |
| 11350             | 10830             | 520         |
| 11404             | 11486             | -82         |
| 11459             | 12100             | -641        |
| 11515             | 12764             | -1249       |
| 11573             | 13864             | -2291       |
| 11043             | 9111              | 1932        |
| 11112             | 9900              | 1212        |
| 11182             | 10645             | 537         |
| 11251             | 11279             | -28         |
| 11322             | 12051             | -729        |

---

|       |       |       |
|-------|-------|-------|
| 11393 | 12792 | -1399 |
| 10855 | 8305  | 2550  |
| 10937 | 8730  | 2207  |
| 11019 | 9144  | 1875  |
| 11100 | 10531 | 569   |
| 11182 | 10850 | 332   |
| 11262 | 11060 | 202   |

The calculation results of this simulation listed in Table S5.

Table S5. Results of model calculation

|                               |      |       |       |       |       |       |
|-------------------------------|------|-------|-------|-------|-------|-------|
| $\Delta(\text{Sample 1-6})$   | -499 | -1119 | -1735 | -2355 | -2966 | -3586 |
| $\Delta(\text{Sample 7-12})$  | 1126 | 519   | -82   | -640  | -1249 | -2291 |
| $\Delta(\text{Sample 13-18})$ | 1932 | 1212  | 538   | -28   | -730  | -1400 |
| $\Delta(\text{Sample 19-24})$ | 2550 | 2207  | 1874  | 569   | 332   | 202   |

## 2.4. Applicability Verification of Supply-Demand Model

In order to verify the universality of the supply-demand relationship model and theory, we performed the above calculations on the existing publication<sup>14, 15</sup> on the amphoteric behavior of oxides. The result is shown in Figure S6.

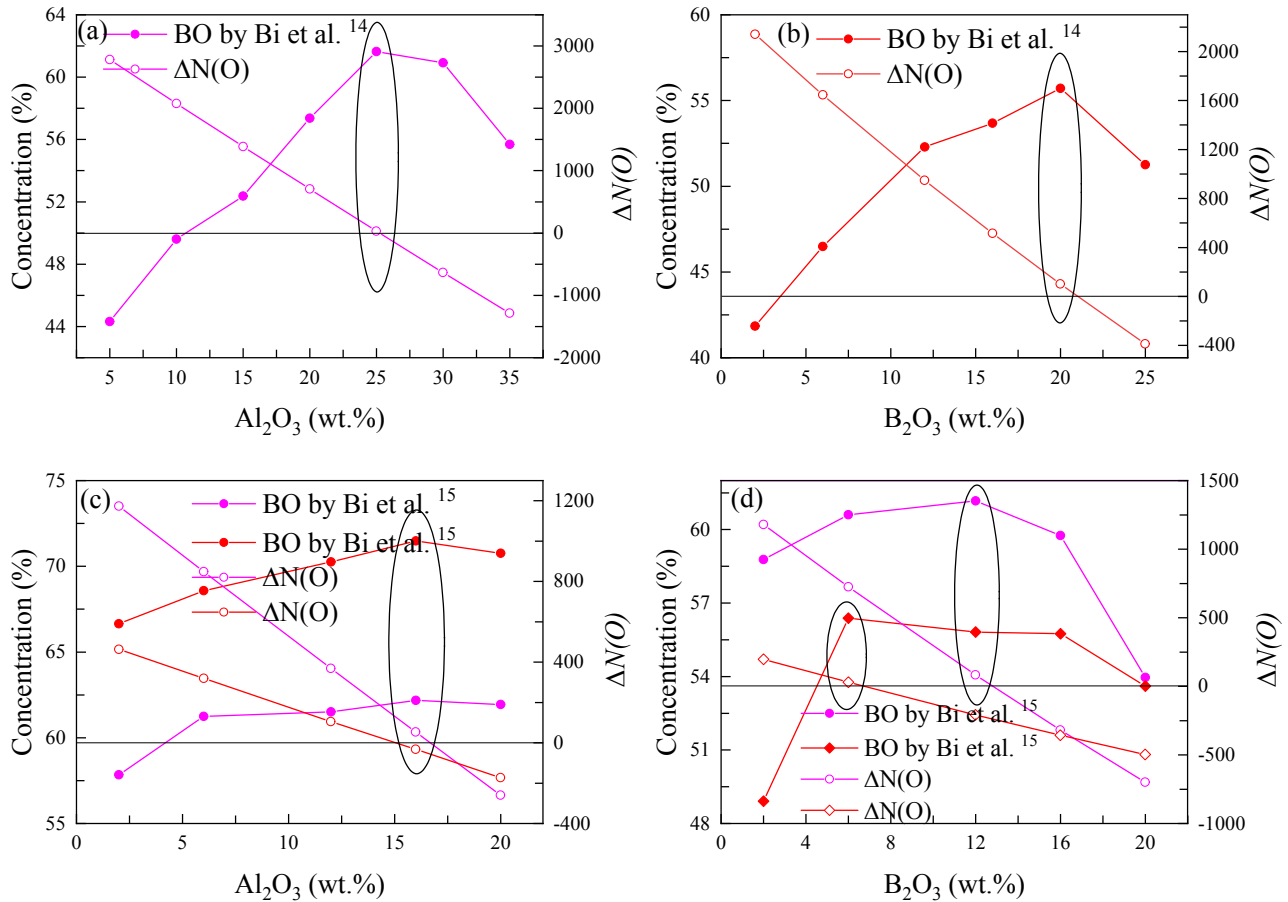

Figure S6. The calculation results of the supply-demand relationship model on the existing publications: (a-b) the data of bridge oxygen comes from the research results of  $SiO_2$ -CaO- $Al_2O_3$  and  $SiO_2$ -CaO- $B_2O_3$  systems by Bi et al.<sup>14</sup>; (c-d) the data of bridge oxygen comes from the research results of  $SiO_2$ -CaO- $Al_2O_3$ - $B_2O_3$  systems by Bi et al.<sup>15</sup>. (a-b) Reprinted (Adapted or Reprinted in part) with permission from [Bi, Z.; Li, K.; Jiang, C.; Zhang, J.; Ma, S. Effects of amphoteric oxide ( $Al_2O_3$  and  $B_2O_3$ ) on the structure and properties of  $SiO_2$ -CaO melts by molecular dynamics simulation. Journal of



Non-Crystalline Solids. 2021, 559, 120687.] Copyright [2021], with permission from [Journal of Non-Crystalline Solids]. (c-d) Reprinted (Adapted or Reprinted in part) with permission from [Bi, Z.; Li, K.; Jiang, C.; Zhang, J.; Ma, S.; Sun, M.; Wang, Z.; Li, H. Performance and transition mechanism from acidity to basicity of amphoteric oxides ( $\text{Al}_2\text{O}_3$  and  $\text{B}_2\text{O}_3$ ) in  $\text{SiO}_2$ - $\text{CaO}$ - $\text{Al}_2\text{O}_3$ - $\text{B}_2\text{O}_3$  system: A molecular dynamics study. Ceramics International. 2021, 47, 12252-12260.] Copyright [2021], with permission from [Ceramics International].

The calculation results of the supply-demand relationship model of oxides in Figure S6 show that the difference curves of the supply-demand relationship of the systems  $\text{SiO}_2$ - $\text{CaO}$ - $\text{Al}_2\text{O}_3$ ,  $\text{SiO}_2$ - $\text{CaO}$ - $\text{B}_2\text{O}_3$  and  $\text{SiO}_2$ - $\text{CaO}$ - $\text{Al}_2\text{O}_3$ - $\text{B}_2\text{O}_3$  do possess the clear zero points, and the zero points are indeed near the concentration points of the amphoteric transition.

For more calculation details, see Table S6-S9

Table S6. The results of the supply-demand relationship model of  $\text{SiO}_2$ - $\text{CaO}$ - $\text{Al}_2\text{O}_3$  system<sup>14</sup>. Reprinted (Adapted or Reprinted in part) with permission from [Bi, Z.; Li, K.; Jiang, C.; Zhang, J.; Ma, S. Effects of amphoteric oxide ( $\text{Al}_2\text{O}_3$  and  $\text{B}_2\text{O}_3$ ) on the structure and properties of  $\text{SiO}_2$ - $\text{CaO}$  melts by molecular dynamics simulation. Journal of Non-Crystalline Solids. 2021, 559, 120687.] Copyright [2021], with permission from [Journal of Non-Crystalline Solids]

| Si   | Ca   | Al   | O    | $N(O)_{supplied}$ | $N(O)_{demanded}$ | $\Delta(O)$ |
|------|------|------|------|-------------------|-------------------|-------------|
| 1746 | 2095 | 230  | 5932 | 10914.88          | 8134              | 2780.88     |
| 1641 | 1969 | 456  | 5935 | 10920.4           | 8844              | 2076.4      |
| 1538 | 1846 | 678  | 5939 | 10927.76          | 9542              | 1385.76     |
| 1436 | 1724 | 896  | 5940 | 10929.6           | 10224             | 705.6       |
| 1336 | 1604 | 1114 | 5947 | 10942.48          | 10914             | 28.48       |
| 1317 | 1580 | 1156 | 5948 | 10944.32          | 11048             | -103.68     |
| 1297 | 1556 | 1198 | 5947 | 10942.48          | 11178             | -235.52     |

|      |      |      |      |          |       |         |
|------|------|------|------|----------|-------|---------|
| 1277 | 1533 | 1242 | 5950 | 10948    | 11318 | -370    |
| 1258 | 1509 | 1284 | 5951 | 10949.84 | 11452 | -502.16 |
| 1238 | 1486 | 1326 | 5951 | 10949.84 | 11582 | -632.16 |
| 1141 | 1369 | 1536 | 5955 | 10957.2  | 12244 | -1286.8 |

Table S7. The results of the supply-demand relationship model of SiO<sub>2</sub>-CaO-B<sub>2</sub>O<sub>3</sub> system <sup>14</sup>. Reprinted (Adapted or Reprinted in part) with permission from [Bi, Z.; Li, K.; Jiang, C.; Zhang, J.; Ma, S. Effects of amphoteric oxide (Al<sub>2</sub>O<sub>3</sub> and B<sub>2</sub>O<sub>3</sub>) on the structure and properties of SiO<sub>2</sub>-CaO melts by molecular dynamics simulation. Journal of Non-Crystalline Solids. 2021, 559, 120687.] Copyright [2021], with permission from [Journal of Non-Crystalline Solids]

| Si   | Ca   | B    | O    | $N(O)_{supplied}$ | $N(O)_{demanded}$ | $\Delta(O)$ |
|------|------|------|------|-------------------|-------------------|-------------|
| 1790 | 2148 | 134  | 5929 | 10553.62          | 8412              | 2141.62     |
| 1671 | 2005 | 390  | 5932 | 10558.96          | 8912.4            | 1646.56     |
| 1504 | 1805 | 752  | 5941 | 10574.98          | 9625.6            | 949.38      |
| 1400 | 1680 | 976  | 5944 | 10580.32          | 10064             | 516.32      |
| 1301 | 1561 | 1190 | 5948 | 10587.44          | 10484.4           | 103.04      |
| 1277 | 1532 | 1242 | 5949 | 10589.22          | 10586.8           | 2.42        |
| 1253 | 1504 | 1294 | 5951 | 10592.78          | 10689.2           | -96.42      |
| 1230 | 1476 | 1344 | 5952 | 10594.56          | 10788             | -193.44     |
| 1206 | 1448 | 1394 | 5951 | 10592.78          | 10882.4           | -289.62     |
| 1184 | 1420 | 1444 | 5954 | 10598.12          | 10985.6           | -387.48     |

Table S8. The results of the supply-demand relationship model of SiO<sub>2</sub>-CaO-Al<sub>2</sub>O<sub>3</sub>-B<sub>2</sub>O<sub>3</sub> system <sup>15</sup>. Reprinted (Adapted or Reprinted in part) with permission from [Bi, Z.; Li, K.; Jiang, C.; Zhang, J.; Ma, S.; Sun, M.; Wang, Z.; Li, H. Performance and transition mechanism from acidity to basicity of amphoteric oxides (Al<sub>2</sub>O<sub>3</sub> and B<sub>2</sub>O<sub>3</sub>) in SiO<sub>2</sub>-CaO-Al<sub>2</sub>O<sub>3</sub>-B<sub>2</sub>O<sub>3</sub> system: A molecular dynamics study. Ceramics International. 2021, 47, 12252-12260.] Copyright [2021], with permission from [Ceramics International]

| Si | Ca | Al | B | O | $N(O)_{supplied}$ | $N(O)_{demanded}$ | $\Delta(O)$ |
|----|----|----|---|---|-------------------|-------------------|-------------|
|----|----|----|---|---|-------------------|-------------------|-------------|

|      |      |      |      |      |          |         |         |
|------|------|------|------|------|----------|---------|---------|
| 1686 | 2023 | 226  | 132  | 5932 | 10558.96 | 8402    | 2156.96 |
| 1570 | 1885 | 220  | 388  | 5937 | 10567.86 | 8932    | 1635.86 |
| 1409 | 1690 | 212  | 746  | 5945 | 10582.1  | 9680    | 902.1   |
| 1307 | 1569 | 208  | 970  | 5950 | 10591    | 10148   | 443     |
| 1211 | 1454 | 202  | 1182 | 5952 | 10594.56 | 10582   | 12.56   |
| 1382 | 1658 | 884  | 130  | 5943 | 11648.28 | 10468   | 1180.28 |
| 1277 | 1533 | 862  | 378  | 5947 | 11656.12 | 10930   | 726.12  |
| 1130 | 1356 | 830  | 730  | 5956 | 11673.76 | 11590   | 83.76   |
| 1037 | 1245 | 810  | 950  | 5959 | 11679.64 | 11998   | -318.36 |
| 950  | 1139 | 790  | 1158 | 5961 | 11683.56 | 12382   | -698.44 |
| 1092 | 1310 | 1514 | 128  | 5957 | 11914    | 11716.4 | 197.6   |
| 996  | 1196 | 1476 | 372  | 5960 | 11920    | 11889.6 | 30.4    |
| 862  | 1035 | 1424 | 714  | 5966 | 11932    | 12140.4 | -208.4  |
| 778  | 934  | 1390 | 930  | 5970 | 11940    | 12296   | -356    |
| 698  | 838  | 1358 | 1134 | 5972 | 11944    | 12440.8 | -496.8  |

Table S9. The results of the supply-demand relationship model of SiO<sub>2</sub>-CaO-Al<sub>2</sub>O<sub>3</sub>-B<sub>2</sub>O<sub>3</sub> system <sup>15</sup>. Reprinted (Adapted or Reprinted in part) with permission from [Bi, Z.; Li, K.; Jiang, C.; Zhang, J.; Ma, S.; Sun, M.; Wang, Z.; Li, H. Performance and transition mechanism from acidity to basicity of amphoteric oxides (Al<sub>2</sub>O<sub>3</sub> and B<sub>2</sub>O<sub>3</sub>) in SiO<sub>2</sub>-CaO-Al<sub>2</sub>O<sub>3</sub>-B<sub>2</sub>O<sub>3</sub> system: A molecular dynamics study. *Ceramics International*. 2021, 47, 12252-12260.] Copyright [2021], with permission from [Ceramics International]

| Si   | Ca   | Al   | B   | O    | $N(O)_{supplied}$ | $N(O)_{demanded}$ | $\Delta(O)$ |
|------|------|------|-----|------|-------------------|-------------------|-------------|
| 1659 | 1991 | 326  | 90  | 5933 | 10560.74          | 8210              | 2350.74     |
| 1579 | 1894 | 324  | 266 | 5937 | 10567.86          | 8410              | 2157.86     |
| 1459 | 1751 | 322  | 526 | 5941 | 10574.98          | 8702              | 1872.98     |
| 1380 | 1657 | 320  | 698 | 5944 | 10580.32          | 8894              | 1686.32     |
| 1303 | 1563 | 318  | 868 | 5948 | 10587.44          | 9088              | 1499.44     |
| 1265 | 1518 | 1186 | 82  | 5950 | 11543             | 10369.2           | 1173.8      |
| 1193 | 1432 | 1180 | 242 | 5951 | 11544.94          | 10696             | 848.94      |
| 1088 | 1305 | 1170 | 480 | 5956 | 11554.64          | 11186             | 368.64      |
| 1018 | 1222 | 1164 | 636 | 5958 | 11558.52          | 11504.8           | 53.72       |
| 950  | 1139 | 1158 | 790 | 5961 | 11564.34          | 11823.6           | -259.26     |
| 936  | 1124 | 1904 | 74  | 5963 | 12045.26          | 11582             | 463.26      |

|     |      |      |     |      |          |       |        |
|-----|------|------|-----|------|----------|-------|--------|
| 872 | 1047 | 1894 | 222 | 5965 | 12049.3  | 11730 | 319.3  |
| 778 | 933  | 1880 | 440 | 5969 | 12057.38 | 11952 | 105.38 |
| 716 | 859  | 1870 | 584 | 5972 | 12063.44 | 12096 | -32.56 |
| 654 | 785  | 1862 | 726 | 5975 | 12069.5  | 12242 | -172.5 |

In addition, the research of Chen et al.<sup>16</sup> is calculated by the model of supply and demand, and the results show that the model of supply and demand is also applicable to Chen et al.<sup>16</sup> Firstly, the number of oxygen atoms supplied by the system is determined by the system setting in this paper. Then, the amount of oxygen demanded by the system and the limit factor can be calculated by the coordination numbers of Si and Al and the corresponding coordination numbers. Finally, the supply and demand function is calculated to judge the relationship between the zero point and the turning point of Al<sub>2</sub>O<sub>3</sub>.

Figure S7 is the data figure of atomic structure change in molecular dynamics study by Chen et al. Through data capture, the contents of various oxygen and coordination of Al in this study are counted in Table S10. Table S11 counts the number of oxygen atoms required by the system and the size of the limit factor. The related data of Table S10 and Table S11 are plotted as Figure S8. By analyzing the turning point of the bridge oxygen curve and the zero point of the supply-demand function in Figure S8, it can be seen that the calculation model of supply-demand relationship is also applicable to Dr. Chen's research on the amphoteric behavior of oxides. The following analysis authors have been added to the Supporting Information.

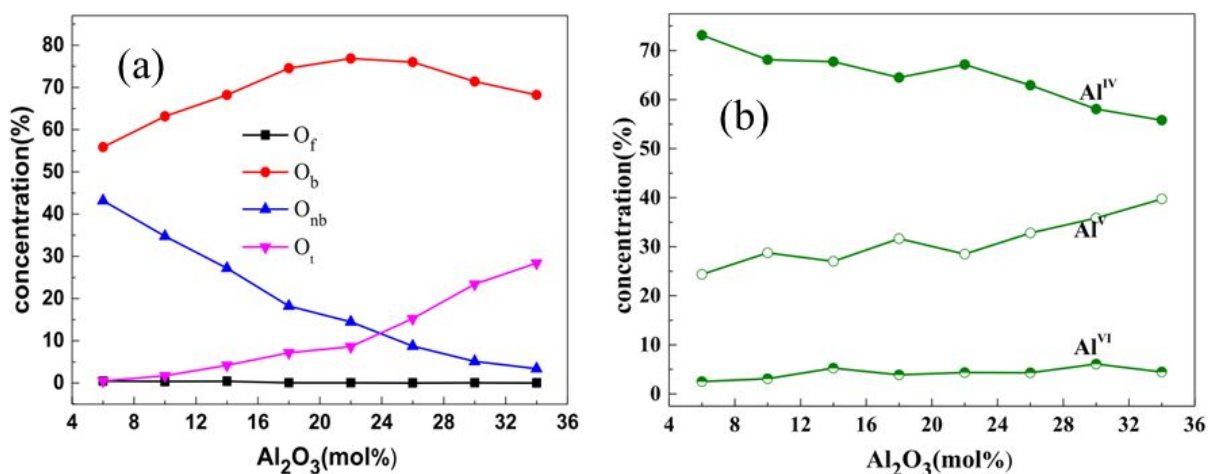

Figure S7 Changes of oxygen network structure and coordination number of Al in Dr. Chen's research<sup>16</sup>. Reprinted (Adapted or Reprinted in part) with permission from [Chen, Y.; Pan, W.; Jia, B.; Wang, Q.; Zhang, X.; Wang, Q.; He, S. Effects of the amphoteric behavior of Al<sub>2</sub>O<sub>3</sub> on the structure and properties of CaO-SiO<sub>2</sub>-Al<sub>2</sub>O<sub>3</sub> melts by molecular dynamics. Journal of Non-Crystalline Solids. 2021, 552, 120435.] Copyright [2021], with permission from [Journal of Non-Crystalline Solids].

Table S10 The contents of various oxygen and coordination of Al. Reprinted (Adapted or Reprinted in part) with permission from [Chen, Y.; Pan, W.; Jia, B.; Wang, Q.; Zhang, X.; Wang, Q.; He, S. Effects of the amphoteric behavior of Al<sub>2</sub>O<sub>3</sub> on the structure and properties of CaO-SiO<sub>2</sub>-Al<sub>2</sub>O<sub>3</sub> melts by molecular dynamics. Journal of Non-Crystalline Solids. 2021, 552, 120435.] Copyright [2021], with permission from [Journal of Non-Crystalline Solids]

| Al <sub>2</sub> O <sub>3</sub> (mol.%) | NBO   | BO    | TO    | 4-coordination | 5-coordination | 6-coordination |
|----------------------------------------|-------|-------|-------|----------------|----------------|----------------|
| 6.00                                   | 43.11 | 55.89 | 0.37  | 73.44          | 24.39          | 2.17           |
| 10.00                                  | 34.70 | 63.20 | 1.46  | 68.28          | 28.69          | 3.03           |
| 14.00                                  | 27.03 | 67.95 | 4.38  | 67.70          | 27.25          | 5.04           |
| 18.00                                  | 18.26 | 74.52 | 6.94  | 64.26          | 31.84          | 3.89           |
| 22.00                                  | 14.61 | 76.71 | 8.77  | 67.42          | 28.40          | 4.18           |
| 26.00                                  | 8.77  | 75.62 | 14.98 | 63.40          | 32.70          | 3.89           |
| 30.00                                  | 5.11  | 71.23 | 23.38 | 57.95          | 36.15          | 5.90           |
| 34.00                                  | 3.29  | 68.68 | 28.13 | 55.94          | 39.30          | 4.75           |

Table S11 Calculation results of supply-demand model

|        | Al <sub>2</sub> O <sub>3</sub> | supplied | demanded | ΔN       |
|--------|--------------------------------|----------|----------|----------|
| R=0.95 | 6.00                           | 4560     | 3616.288 | 943.7123 |
|        | 10.00                          | 4560     | 3880.787 | 679.2131 |
|        | 14.00                          | 4560     | 4130.357 | 429.6426 |
|        | 18.00                          | 4560     | 4369.4   | 190.6    |
|        | 22.00                          | 4560     | 4568.486 | -8.48607 |
|        | 26.00                          | 4560     | 4787.246 | -227.246 |
|        | 30.00                          | 4560     | 5029.877 | -469.877 |
|        | 34.00                          | 4560     | 5220.349 | -660.349 |

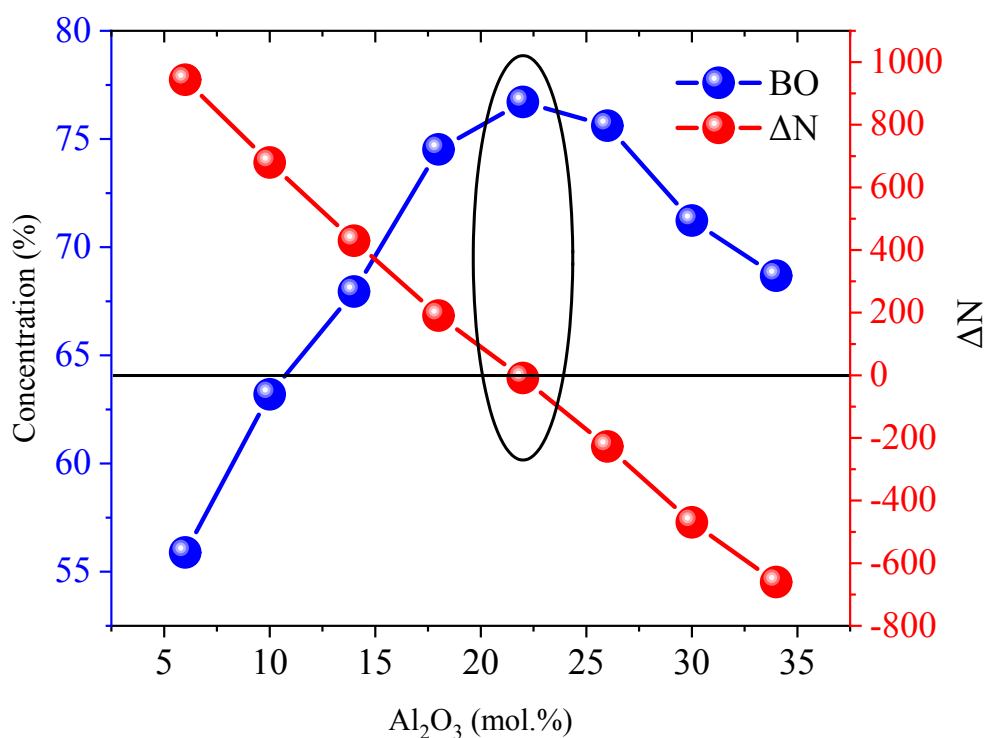

Figure S8 Calculation results of supply-demand model<sup>16</sup>. Reprinted (Adapted or Reprinted in part) with permission from [Chen, Y.; Pan, W.; Jia, B.; Wang, Q.; Zhang, X.; Wang, Q.; He, S. Effects of the amphoteric behavior of Al<sub>2</sub>O<sub>3</sub> on the structure and properties of CaO-SiO<sub>2</sub>-Al<sub>2</sub>O<sub>3</sub> melts by molecular dynamics. Journal of Non-Crystalline Solids. 2021, 552, 120435.] Copyright [2021], with permission from [Journal of Non-Crystalline Solids].

---

## References

- (1) Zhang, S.; Zhang, X.; Bai, C.; Wen, L.; Lv, X. Effect of TiO<sub>2</sub> content on the structure of CaO-SiO<sub>2</sub>-TiO<sub>2</sub> system by molecular dynamics simulation. *ISIJ Int.* 2013, *53*, 1131-1137.
- (2) Yao, T.; He, S.; Wu, T.; Wang, Q. Molecular dynamics simulations of microstructural properties of CaO-SiO<sub>2</sub>-TiO<sub>2</sub> fluorine-free slag systems. *Ironmak. Steelmak.* 2017, *44*, 551-558.
- (3) Zhao, G.; Perilla, J. R.; Yufenyuy, E. L.; Meng, X.; Chen, B.; Ning, J.; Ahn, J.; Gronenborn, A. M.; Schulten, K.; Aiken, C., et al. Mature HIV-1 capsid structure by cryo-electron microscopy and all-atom molecular dynamics. *Nature* 2013, *497*, 643-6.
- (4) Roux, S. L.; Petkov, V. ISAACS-interactive structure analysis of amorphous and crystalline systems. *Journal of Applied Crystallography* 2010, *43*, 181-185.
- (5) Loken, C.; Gruner, D.; Groer, L.; Peltier, R.; Bunn, N.; Craig, M.; Henriques, T.; Dempsey, J.; Yu, C.; Chen, J., et al. SciNet: Lessons Learned from Building a Power-efficient Top-20 System and Data Centre. *Journal of Physics: Conference Series* 2010, *256*.
- (6) Ponce, M.; van Zon, R.; Northrup, S.; Gruner, D.; Chen, J.; Ertinaz, F.; Fedoseev, A.; Groer, L.; Mao, F.; Mundim, B. C., et al. Deploying a Top-100 Supercomputer for Large Parallel Workloads: the Niagara Supercomputer. 2019, 1-8.
- (7) Sahoo, M.; Yadav, A.; Jha, S.; Bhattacharyya, D.; Mathews, T.; Sahoo, N.; Dash, S.; Tyagi, A. Nitrogen location and Ti-O bond distances in pristine and N-doped TiO<sub>2</sub> anatase thin films by X-ray absorption studies. *The Journal of Physical Chemistry C* 2015, *119*, 17640-17647.
- (8) Li, K.; Zhang, J.; Bouhadja, M.; Barati, M.; Yang, T.; Liu, Z.; Sahajwall, V.; Singh, C. V.; Su, B.; Khanna, R. A molecular dynamic simulation on the factors influencing the fluidity of molten coke ash during alkalization with K<sub>2</sub>O and Na<sub>2</sub>O. *Chem. Eng. J.* 2017, *313*, 1184-1193.
- (9) Jiang, N.; Su, D.; Spence, J. Determination of Ti coordination from pre-edge peaks in Ti K-edge XANES. *Physical Review B* 2007, *76*, 214117.
- (10) Plimpton, S. Fast parallel algorithms for short-range molecular dynamics. *J. Comput. Phys.* 1995, *117*, 1-19.
- (11) Haffad, D.; Chambellan, A.; Lavalley, J. Propan-2-ol transformation on simple metal oxides TiO<sub>2</sub>, ZrO<sub>2</sub> and CeO<sub>2</sub>. *Journal of Molecular Catalysis A: Chemical* 2001, *168*, 153-164.
- (12) Bakbolat, B.; Daulbayev, C.; Sultanov, F.; Beissenov, R.; Umirzakov, A.; Mereke, A.; Bekbaev, A.; Chuprakov, I. Recent Developments of TiO<sub>2</sub>-Based Photocatalysis in the Hydrogen Evolution and Photodegradation: A Review. *Nanomaterials* 2020, *10*, 1790.
- (13) Li, Z.; Qi, M.; Tu, C.; Wang, W.; Chen, J.; Wang, A. Highly efficient removal of chlorotetracycline from aqueous solution using graphene oxide/TiO<sub>2</sub> composite: Properties and mechanism. *Applied Surface Science* 2017, *425*, 765-775.
- (14) Bi, Z.; Li, K.; Jiang, C.; Zhang, J.; Ma, S. Effects of amphoteric oxide (Al<sub>2</sub>O<sub>3</sub> and B<sub>2</sub>O<sub>3</sub>) on the structure and properties of SiO<sub>2</sub>-CaO melts by molecular dynamics simulation. *J Non Cryst Solids* 2021, *559*, 120687.
- (15) Bi, Z.; Li, K.; Jiang, C.; Zhang, J.; Ma, S.; Sun, M.; Wang, Z.; Li, H. Performance and transition mechanism from acidity to basicity of amphoteric oxides (Al<sub>2</sub>O<sub>3</sub> and B<sub>2</sub>O<sub>3</sub>) in SiO<sub>2</sub>-CaO-Al<sub>2</sub>O<sub>3</sub>-B<sub>2</sub>O<sub>3</sub> system: A molecular dynamics study. *Ceram. Int.* 2021, *47*, 12252-12260.
- (16) Chen, Y.; Pan, W.; Jia, B.; Wang, Q.; Zhang, X.; Wang, Q.; He, S. Effects of the

---

amphoteric behavior of  $\text{Al}_2\text{O}_3$  on the structure and properties of  $\text{CaO-SiO}_2\text{-Al}_2\text{O}_3$  melts by molecular dynamics. *J Non Cryst Solids* 2021, 552, 120435.
